## Optimizing COVID-19 control with asymptomatic surveillance testing in a university environment

Cara E. Brook<sup>1\*</sup>, Graham R. Northrup<sup>2</sup>, Alexander J. Ehrenberg<sup>1,3,4,5</sup>, the IGI Testing Consortium<sup>3</sup>, Jennifer A. Doudna<sup>3,6,7,8,9</sup>, and Mike Boots<sup>1,10</sup>

<sup>1</sup> Department of Integrative Biology, University of California, Berkeley

<sup>2</sup> Center for Computational Biology, College of Engineering, University of California, Berkeley

<sup>3</sup> Innovative Genomics Institute, University of California, Berkeley

<sup>4</sup> Helen Wills Neuroscience Institute, University of California, Berkeley

<sup>5</sup> Memory and Aging Center, Weill Institute for Neurosciences, University of California, San Francisco

<sup>6</sup> Department of Molecular and Cell Biology, University of California, Berkeley

<sup>7</sup> College of Chemistry, University of California, Berkeley

<sup>8</sup> J. David Gladstone Institutes, San Francisco, CA

<sup>9</sup> Howard Hughes Medical Institute, University of California, Berkeley

<sup>10</sup> Department of Biosciences, University of Exeter, Penryn, UK

\*corresponding author: *Cara E. Brook*

address: 5017 Valley Life Sciences Building, University of California, Berkeley

phone: 707-241-5550

email: [cbrook@berkeley.edu](mailto:cbrook@berkeley.edu)

1 **Abstract**

2 The high proportion of transmission events derived from asymptomatic or presymptomatic  
3 infections make SARS-CoV-2, the causative agent in COVID-19, difficult to control through the  
4 traditional non-pharmaceutical interventions (NPIs) of symptom-based isolation and contact  
5 tracing. As a consequence, many US universities have developed asymptomatic surveillance  
6 testing labs, to augment existing NPIs and control outbreaks on campus. We built a stochastic  
7 branching process model of COVID-19 dynamics to advise optimal control strategies in a  
8 university environment. Our model combines behavioral interventions in the form of group size  
9 limits to deter superspreading, symptom-based isolation, and contact tracing, with asymptomatic  
10 surveillance testing. We find that behavioral interventions offer a cost-effective means of  
11 epidemic control: group size limits of six or fewer greatly reduce superspreading, and rapid  
12 isolation of symptomatic infections can halt rising epidemics, depending on the frequency of  
13 asymptomatic transmission in the population. Surveillance testing can overcome uncertainty  
14 surrounding asymptomatic infections, with the most effective approaches prioritizing frequent  
15 testing with rapid turnaround time to isolation over test sensitivity. Importantly, contact tracing  
16 amplifies population-level impacts of all infection isolations, making even delayed interventions  
17 effective. Combination of behavior-based NPIs and asymptomatic surveillance also reduces  
18 variation in daily case counts to produce more predictable epidemics. Furthermore, targeted,  
19 intensive testing of a minority of high transmission risk individuals can effectively control the  
20 COVID-19 epidemic for the surrounding population. We offer this blueprint and easy-to-  
21 implement modeling tool to other academic or professional communities navigating optimal  
22 return-to-work strategies for the 2021 year.

23  
24  
25  
26  
27  
28  
29  
30  
31  
32  
33  
34  
35  
36  
37  
38  
39  
40

## 41 Introduction

42 Non-pharmaceutical interventions (NPIs) to control the spread of infectious diseases vary  
43 in efficacy depending on the natural history of pathogen that is targeted (1). Highly transmissible  
44 pathogens and pathogens for which the majority of onward transmission events take place prior  
45 to the onset of symptoms are notoriously difficult to control with standard public health  
46 approaches, such as isolation of symptomatic individuals and contact tracing (1). SARS-CoV-2,  
47 the causative agent in COVID-19, is a now a clear example of one of these difficult-to-control  
48 pathogens (2). While the first SARS-CoV was effectively contained via the isolation of  
49 symptomatic individuals following emergence in 2002 (3), at the time of writing, SARS-CoV-2  
50 remains an ongoing public health menace that has infected more than 82 million people  
51 worldwide (4). Though the two coronaviruses are epidemiologically comparable in their basic  
52 reproduction numbers ( $R_0$ ) (3), SARS-CoV-2 has evaded control efforts largely because the  
53 majority of virus transmission events occur prior to the onset of clinical symptoms in infected  
54 persons (2)—in stark contrast to infections with the first SARS-CoV (3). Indeed, in many cases,  
55 SARS-CoV-2-infected individuals never experience symptoms at all (5–8) but, nonetheless,  
56 remain capable of transmitting the infection to others (9–13). Due to the challenges associated  
57 with asymptomatic and presymptomatic transmission (10), surveillance testing of asymptomatic  
58 individuals has the potential to play a critical role in COVID-19 epidemic control (14–16).  
59 Surveillance testing is always valuable for research purposes, but its efficacy as a public health  
60 intervention will depend on both the epidemiology of the focal infection and the characteristics  
61 of the testing regime. Here, we explore the effects of both behavior-based NPIs and  
62 asymptomatic surveillance testing on COVID-19 control in a university environment.

63 As the North American winter advances, the United States leads the globe with over 21  
64 million reported cases of COVID-19 (4), and universities across the nation continue to struggle  
65 to control epidemics in their campus communities (17). To combat this challenge, colleges have  
66 adopted a variety of largely independent COVID-19 control tactics, ranging from entirely virtual  
67 formats to a mix of in-person and remote learning, paired with strict behavioral regulations,  
68 and—in some cases—in-house asymptomatic surveillance testing (18). As we approach the 2021  
69 academic semester, asymptomatic surveillance testing is likely to play a key role in university  
70 plans for expanding reopening in the new semester (18, 19). In March 2020, shortly after the  
71 World Health Organization declared COVID-19 to be a global pandemic (20), the University of  
72 California, Berkeley, launched its own pop-up SARS-CoV-2 testing lab in the Innovative  
73 Genomics Institute (IGI) (21) with the aim of providing COVID diagnostic services to the UC  
74 Berkeley community and underserved populations in the surrounding East Bay region. Though  
75 the IGI RT-qPCR-based pipeline was initially developed to service clinical, symptomatic  
76 nasopharyngeal and oropharyngeal swab samples (21), the IGI subsequently inaugurated an  
77 asymptomatic surveillance testing program for the UC Berkeley community, through which—at  
78 the time of this writing—over 18,000 faculty, students, and staff in the UC Berkeley community  
79 have since been serviced with over 105,000 tests and counting (22).

80 Here we developed a stochastic, agent-based branching process model of COVID-19  
81 spread in a university environment to advise UC Berkeley on best-practice approaches for  
82 surveillance testing in our community and to offer guidelines for optimal control in university  
83 settings more broadly. Previous modeling efforts have used similar approaches to advocate for  
84 more frequent testing with more rapid turnaround times at the expense of heightened test  
85 sensitivity (14, 15) or to weigh the cost-effectiveness of various testing regimes against  
86 symptom-based screening in closed university or professional environments (16). Our model is  
87 unique in combining both behavioral interventions with optimal testing design in a real-world  
88 setting, offering important insights into efficient mechanisms of epidemic control and an  
89 effective tool to optimize control strategies.

90

### 91 **Model design.**

92 Our model takes the form of a stochastic branching process model, in which a subset  
93 population of exposed individuals (0.5%, derived from the mean percentage of positive tests in  
94 our UC Berkeley community (22)) is introduced into a hypothetical 20,000 person community  
95 that approximates the campus utilization goals for our university in spring 2021. With each  
96 timestep, the disease parameters for each infected case are drawn stochastically from  
97 distributions representing the natural history of the SARS-CoV-2 virus, paired with realistic  
98 estimates of the timeline of corresponding public health interventions (2, 16, 23) (Figure 1). Our  
99 flexible model (published here with open-access R-code (24)) allows for the introduction of NPIs  
100 for COVID-19 control in four different forms: (1) group size limits, (2) symptom-based  
101 isolations, (3) surveillance testing isolations, and (4) contact tracing isolations that follow after  
102 cases are identified through screening from symptomatic or surveillance testing. Because we  
103 focus our efforts on optimal surveillance testing regimes, we do not explicitly model other NPIs,  
104 such as social distancing and mask wearing; however, the effects of these behaviors are captured  
105 in our representation of R-effective (hereafter,  $R_E$ ) for both within-campus and out-of-campus  
106 transmission. We do not explicitly incorporate vaccination in the current analysis, but our open-  
107 access R-code is programmed to facilitate easy extension of our work to include exploration of  
108 the varied effects of NPIs on populations with a subset of vaccinated individuals (24), as these  
109 scenarios become more pervasive in the 2021 year.

110

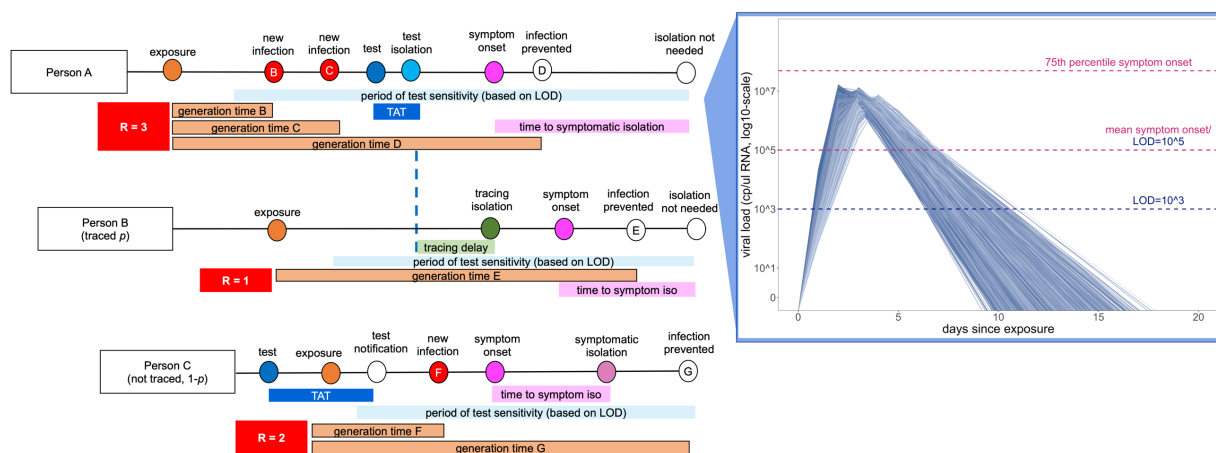

111  
 112 **Figure 1. Conceptual schematic of branching process model of SARS-CoV-2 dynamics.**  
 113 Person A is isolated through testing after exposing Person B and Person C. Person B is then isolated through contact  
 114 tracing, while Person C is not traced but is nonetheless ultimately isolated through symptomatic surveillance. A viral  
 115 titer trajectory (right) is derived from a within-host viral kinetics model (Supplementary File 1), yielding the mean  
 116 titer trajectory and 95% confidence interval shown here. The 25<sup>th</sup> and 75<sup>th</sup> titer threshold percentile for the onset of  
 117 symptoms are depicted in pink, such that 32% of individuals modeled in our simulations did not present symptoms.  
 118 Schematic is adapted in concept from Hellewell et al. (2020) (25).  
 119

120  
 121  $R_E$  is the product of the pathogen basic reproduction number ( $R_0$ ) and the proportion of  
 122 the population that is susceptible to disease.  $R_E$  is thus a dynamic value which corresponds to the  
 123 number of new infections caused by a single infection at a given timepoint within a specified  
 124 community. We compute an independent  $R_E$  for each infectious person in our population that is  
 125 the combined result of both heterogeneity in individual infectiousness and heterogeneity in  
 126 individual contact events that could result in transmission. To determine  $R_E$ , we first draw a  
 127 value of potential cases for each infectious individual in our population from the SARS-CoV-2  
 128 negative binomial distribution for  $R_0$ , estimated to have a mean value of 2.5 and a dispersion  
 129 parameter ( $k$ ) of 0.10 (26). Though representation of  $R_E$  in log-normal vs. negative binomial  
 130 form will not change the average number of cases generated per epidemic, the negative binomial  
 131 distribution replicates the dynamics of superspreading events, which are known to play an  
 132 important role in SARS-CoV-2 dynamics (27–32). Indeed, there is growing direct empirical  
 133 evidence that COVID-19 epidemiology exhibits a negative binomial  $R_E$  across multiple systems  
 134 (31, 33–35); as few as 10% of infectious individuals may be responsible for 80% of onward  
 135 SARS-CoV-2 transmissions (36).

136 We next assume that a minority (10%) of possible onward transmissions are lost to the  
 137 external community (e.g. an infectious UC Berkeley community member infects someone  
 138 outside the UC Berkeley community), and we remove these from our model, such that we  
 139 ultimately aim to report within-campus  $R_E$  as the number of onward cases that a single infectious  
 140 university community member causes within the university community (Supplementary File 1).  
 141 To achieve this, we next assume that social distancing, masking, and behavioral modifications in  
 142 our community will modulate dynamics such that some of the remaining 90% of the original  $R_0$ -

143 derived potential infections do not take place. Because we are specifically interested in advising  
144 UC Berkeley on group size limits for gatherings, we next draw a number of possible onward  
145 transmission events for each infectious individual from a simple Poisson distribution with  $\lambda = 3$ ,  
146 signifying the average number of possible encounters (i.e. cross-household dining, shared car  
147 rides, indoor meetings, etc.) per person that could result in transmission. We then use published  
148 estimates of the generation time of onward transmission events for SARS-CoV-2 infection (2) to  
149 draw event times for these encounters, and we distribute each infectious person's original  
150 number of  $R_0$ -derived potential cases among these events at random. This ensures that multiple  
151 transmissions are possible at a single event; the most extreme superspreading events occur when  
152 persons with heterogeneously high infectiousness draw a large number of potential cases, which  
153 are concentrated within a relatively small number of discrete transmission events. When group  
154 size limit NPIs are imposed, case numbers for each event are truncated at the intervention limit.

155 For each infectious individual, we additionally generate an independent virus trajectory,  
156 using a within-host viral kinetics model for SARS-CoV-2 upper respiratory tract infections,  
157 which is structured after the classic target cell model (37–40). From each independent virus  
158 trajectory, we can then infer a time-varying transmissibility, which is modeled as a Michaelis-  
159 Menten-like function of viral load (40). Deviating from the original published model, we fix the  
160 within-host viral kinetics model constant,  $\theta$ , at a value that allows for a ~50% probability of  
161 infection occurring per transmissible contact event at an infectious individual's peak viral load  
162 (40). Because all possible onward transmissions have been assigned an event generation time, we  
163 next evaluate the viral load of the infectious person at the time of each potential transmission to  
164 determine whether or not it actually takes place. By these metrics, our original  $R_0$ -derived  
165 possible cases are halved, such that  $R_E$ , the number of average onward infections caused by a  
166 single infectious person in the UC Berkeley community, is reduced to just over one ( $R_E=1.05$ ),  
167 consistent with published estimates of Bay Area  $R_E$  and initial asymptomatic test results in our  
168 community (22, 41). The majority of transmission events occur when the infectious host has  
169 higher viral titers, thus biasing new case generations towards earlier timesteps in an individual's  
170 infection trajectory, as is realistic for COVID-19 (23) (Figure 1).

171 In addition to modulating the probability of onward transmission events, each infectious  
172 individual's virus trajectory additionally allows us to compute a timing of symptom onset, which  
173 corresponds to the timepoint at which an individual's virus trajectory crosses some threshold  
174 value for presentation of symptoms. We draw each threshold randomly from a log-normal  
175 distribution with a mean of  $10^5$  virus copies per  $\mu\text{l}$  of RNA; by these metrics, roughly 32% of our  
176 modeled population presents as asymptomatic, in keeping with published estimates for SARS-  
177 CoV-2 (6, 7). Using each infectious individual's viral load trajectory, we are next able to  
178 compute a period of test sensitivity, corresponding to the time during which viral load is high  
179 enough for detection by the virus test in question, based on the modeled limit of detection  
180 (LOD). Surveillance testing results in higher “false-negative” test results both very early and  
181 very late in infection when viral loads are below the LOD for the adopted assay (42) (Figure 1),  
182 though most tests should reliably detect infectious cases with viral titers  $>10^6$  cp/ $\mu\text{l}$  (43–45). We



183 explore dynamics across a range of published values for test LOD:  $10^1$ ,  $10^3$ , and  $10^5$  virus copies  
184 per  $\mu\text{l}$  of RNA. The IGI's RT-qPCR-based testing pipeline has a published sensitivity of 1 cp/ $\mu\text{l}$   
185 (21), while the majority of SARS-CoV-2 RT-qPCR tests nationally are reliable above a  $10^3$  cp/ $\mu\text{l}$   
186 threshold (46); less-sensitive antigen-based and LAMP assays report detection limits around  $10^5$   
187 cp/ $\mu\text{l}$  (47, 48).

188 In addition to within-community transmissions, all individuals in the modeled population  
189 are also subjected to a daily hazard (0.15%) of becoming infected from an external source, based  
190 on published estimates of  $R_E$  and COVID-19 prevalence in Alameda County (41, 49). We report  
191 the mean results of 100 stochastic runs of each proposed intervention.

192

## 193 **Results.**

### 194 **Comparing behavioral NPIs for COVID-19 control.**

195 We first ran a series of epidemic simulations using a completely mixed population of  
196 20,000 individuals subject to the infection dynamics outlined above to compare and contrast the  
197 impacts of our four NPIs on COVID-19 control. We introduced an initial population of 100  
198 infectious individuals (0.5%) at timestep 0 and compared the effects of a single target  
199 intervention on epidemic trajectories after the first 50 days of simulation. Less intensive or  
200 intervention-absent scenarios allowed infectious cases to grow at unimpeded exponential rates,  
201 rapidly exhausting our susceptible supply and making it necessary to compare results at a  
202 consistent (and early) timepoint in our simulated epidemics.

203 As a consequence of our representation of  $R_E$  in negative binomial form, we first  
204 considered the COVID-19 control effectiveness of group size limits on in-person gatherings,  
205 which doubled as upper thresholds in transmission capacity (Figure 2). Assuming that 90% of  
206 the modeled population adhered to assumed group size regulations, we found that limiting  
207 outdoor gatherings to groups of six or fewer individuals saved a mean of  $\sim 7,900$  cases per 50-  
208 day simulation (in a 20,000 person population) and corresponded to an  $R_E$  reduction of nearly  
209 0.20 (reducing  $R_E$  from 1.05 to subclinical 0.86; Figure 2; Supplementary File 2). By contrast, a  
210 large group size limit of 50 persons had almost no effect on epidemic dynamics; under published  
211 estimates of SARS-CoV-2 negative binomial  $R_E$  (26), a group size limit of 50 will restrict  
212 transmission from only 0.00039% of infectious individuals (Figure 2). Gains in epidemic control  
213 from group size limits resulted from avoidance of superspreading events, an approach that was  
214 effective for negative binomial but not log-normal representations of  $R_E$  that lack the  
215 transmission "tail" characteristic of a superspreader distribution (32) (Figure 2-S1). Importantly,  
216 by avoiding superspreading events, group size limits also reduced variance in daily case counts,  
217 yielding more predictable epidemics, which are easier to control through testing and contact  
218 tracing (2, 23, 25). Over the July 4 weekend, surveillance testing resources in our UC Berkeley  
219 community were overwhelmed and containment efforts challenged after a single superspreading  
220 event on campus (50).

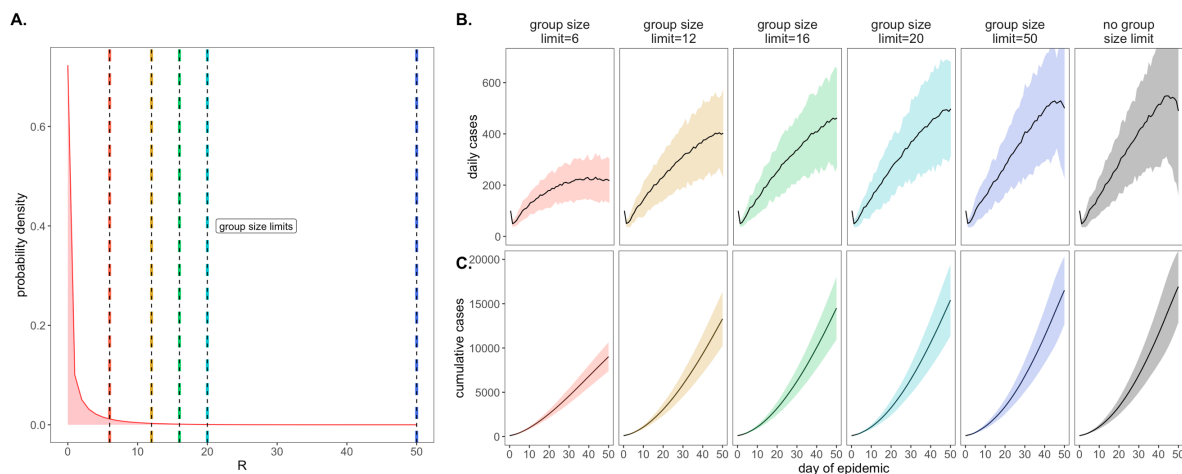

221  
 222 **Figure 2. Effects of group size limits on COVID-19 dynamics.**  
 223 **A.** Negative binomial  $R_E$  distribution with mean = 1.05 and dispersion parameter ( $k$ ) = 0.10. The colored vertical  
 224 dashes indicate group size limits that ‘chop the tail’ on the  $R_E$  distribution; for 90% of the population, coincident  
 225 cases allocated to the same transmission event were truncated at the corresponding threshold for each intervention.  
 226 **B.** Daily new cases and, **C.** Cumulative cases, across a 50-day time series under corresponding, color-coded group  
 227 size limits.  
 228

229 We next investigated the impacts of variation in lag time to self-isolation post-symptom  
 230 onset for the just under 70% of individuals likely to present with COVID-19 symptoms in our  
 231 modeled population (Figure 3). At UC Berkeley, all essential students, faculty, and staff must  
 232 complete a digital ‘Daily Symptom Screener’ before being cleared to work on campus; here, we  
 233 effectively model the delay post-initial symptom onset to the time at which each individual  
 234 recognizes symptoms sufficiently to report to the Screener and isolate. For each infected  
 235 individual in our population, we draw a symptom-based isolation lag from a log-normal  
 236 distribution centered on a mean of one to five days, assuming the entire population to be  
 237 compliant with the selected lag.

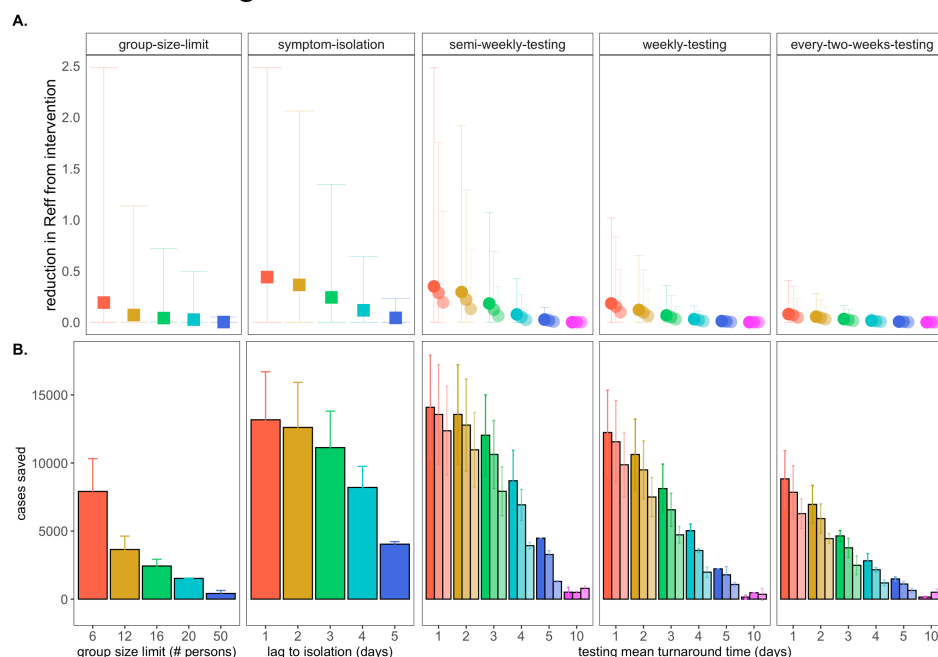



239 **Figure 3. Impacts of NPIs on COVID-19 control.**

240 **A.** Mean reduction in  $R_E^*$  and **B.** cumulative cases saved across 50-day simulated epidemics under assumptions of  
241 differing non-pharmacological interventions (NPIs). NPIs are color-coded by threshold number of persons for  
242 group-size limits, lag-time for symptom-based isolations, and mean turnaround time from test positivity to isolation  
243 of infectious individuals for testing isolations. For testing isolations, shading hue corresponds to test limit of  
244 detection (LOD) with the darkest colors indicating the most sensitive tests with an LOD of  $10^1$  virus copies/ $\mu$ l of  
245 RNA. Progressively lighter shading corresponds to LOD =  $10^3$ ,  $10^5$ , and  $10^7$  cp/ $\mu$ l.

246 *\*Note:  $R_E$  reduction (panel A) is calculated as the difference in mean  $R_E$  in the absence vs. presence of a given NPI.*  
247 *The upper confidence limit (uci) in  $R_E$  reduction is calculated as the difference in uci  $R_E$  in the absence vs. presence*  
248 *of NPI. In our model, mean  $R_E$  in the absence of NPI equals 1.05 and uci  $R_E$  in the absence of NPI equals 8.6.*

249

250 By these metrics, a rapid, one day lag in symptom-based isolation is the fourth-most  
251 effective intervention in our study, with a mean of more than 13,100 cases saved in a 50-day  
252 simulation (again, in a 20,000 person population), corresponding to an  $R_E$  reduction of 0.67,  
253 from 1 to 0.38 (Supplementary File 2). Longer lag times to isolation produced less dramatic  
254 results, but even an average five-day lag to isolation post-symptom onset nonetheless yielded  
255 more than 4,000 cases saved and reduced  $R_E$  by a mean of 0.06. The efficacy of symptom-based  
256 isolation decreased at higher virus titer thresholds for symptom onset, corresponding to a higher  
257 asymptomatic proportion (~50%) of the population (Figure 3-S1); some empirical findings  
258 suggest that these higher titer thresholds for symptom onset may more accurately reflect  
259 COVID-19 epidemiology (51). Because both group size limits and daily screening surveys to  
260 facilitate symptom-based isolation can be implemented without expending substantial resources,  
261 we advocate for these two approaches as particularly cost-effective COVID-19 control strategies  
262 for all university and small community environments—especially those lacking an on-site  
263 surveillance testing lab.

264

265 **Comparing surveillance testing NPIs for COVID-19 control.**

266 Our primary motivation in developing this model was to advise UC Berkeley on best-  
267 practices for asymptomatic surveillance testing. As such, we focused efforts on determining the  
268 most effective use of testing resources by comparing surveillance testing across a range of  
269 approaches that varied test frequency, test turnaround time (TAT, the time from which the test  
270 was administered to the timing of positive case isolation), and test sensitivity (based on the  
271 LOD).

272 We compared all permutations of surveillance testing NPIs, varying test frequency across  
273 semi-weekly, weekly, and every-two-week regimes, investigating TAT across delays of one to  
274 five and ten days, and exploring LODs of  $10^1$ ,  $10^3$ , and  $10^5$  virus copies per  $\mu$ l of RNA. These  
275 test frequency regimes reflect those under consideration at UC Berkeley today: from August-  
276 December 2020, UC Berkeley undergraduates residing in university residence halls were subject  
277 to compulsory semi-weekly asymptomatic surveillance testing, while all other campus  
278 community members were permitted to take part in voluntary testing with a recommended  
279 weekly or every-two-week frequency. TAT values in our model reflect the reality in range of  
280 testing turnaround times from in-house university labs like that at UC Berkeley to institutions

281 forced to outsource testing to commercial suppliers (52), and LOD values span the range in  
282 sensitivity of available SARS-CoV-2 tests (21, 46–48).

283 Across testing regimes broadly, we found test frequency, followed by TAT, to be the  
284 most effective NPIs, with LOD exerting substantially less influence on epidemic dynamics,  
285 consistent with findings published elsewhere (14, 15). The top three most effective NPIs in our  
286 study corresponded to semi-weekly testing regimes with one- and two-day TATs across  $10^1$  and  
287  $10^3$  cp/μl LODs. These three scenarios yielded mean cases saved ranging from just over 14,000  
288 to just over 13,500 in the first 50 days of simulation and produced an  $R_E$  reduction capacity  
289 between 0.97 and 0.80 (Figure 3; Supplementary File 2). Halving test frequency to a weekly  
290 regimen, under assumptions of TAT=1 and LOD= $10^1$ , resulted in a nearly 48% decrease in the  
291 NPI's  $R_E$  reduction capacity. By comparison, a single extra day lag from one to two-day TAT  
292 under semi-weekly testing conditions at LOD= $10^1$  cp/μl yielded a modest 16% decrease in  $R_E$   
293 reduction capacity. However, longer delays in TAT of up to ten days or more—not unusual in  
294 the early stages of the COVID-19 pandemic (52)—were not significantly different from  
295 scenarios in which no intervention was applied at all. This outcome results from the rapid  
296 generation time of SARS-CoV-2 (2); most infectious individuals will have already completed the  
297 majority of subsequent transmissions by the time a testing isolation with a 10-day TAT is  
298 implemented. Nonetheless, encouragingly, reducing test sensitivity from  $10^1$  to  $10^3$  under a semi-  
299 weekly, TAT=1 regime decreased  $R_E$  reduction capacity by only 18%, offering support to  
300 advocates for more frequent but less sensitive tests (53) but also highlighting the added benefit  
301 incurred when university testing labs, like that at UC Berkeley, are able to provide both frequent  
302 and sensitive PCR-based testing.

303 Addition of a contact tracing intervention, in which 90% of infectious contacts were  
304 traced and isolated within a day of the source host isolation, to NPI scenarios already featuring  
305 either symptom-based or surveillance testing isolation enhanced each intervention's capacity for  
306 epidemic control (Figure 3-S2). Of note, contact tracing boosted performance of some of the  
307 poorest performing testing interventions, such that even those previously ineffective surveillance  
308 regimens with 10-day TAT nonetheless averted cases and significantly reduced  $R_E$  when  
309 infectious contacts could be isolated. For a semi-weekly testing regime at LOD= $10^1$  cp/μl and  
310 TAT=10 days, the addition of contact tracing increased mean cases saved from ~510 to >8,600  
311 and increased  $R_E$  reduction capacity from 0.000080 to 0.27 (Supplementary File 3).

312

### 313 **Optimizing combined NPIs for COVID-19 control.**

314 Our modeled simulations indicate that it is possible to achieve largely equivalent gains in  
315 COVID-19 control from NPIs in the form of group size limits, symptom-based isolations, and  
316 surveillance testing isolations—though gains from symptom-based behavioral isolations are  
317 jeopardized under assumptions of a higher proportion of asymptomatic individuals (Figure 3-S1).  
318 Nonetheless, the most effective interventions are realized when behavioral control mechanisms  
319 are *combined* with surveillance testing (Figure 4). Assuming a one day TAT and  $10^1$  cp/μl LOD,  
320 we found that adding (a) contact tracing with 90% adherence and a one-day lag, plus (b)

321 symptom-based isolation with a one-day lag, plus (c) a group size limit of twelve persons to an  
 322 every-two-week surveillance testing regimen could elevate the  $R_E$  reduction capacity from 0.22  
 323 to 0.83 and almost double the ~6,600 cases saved from the testing intervention alone  
 324 (Supplementary File 4). Combining interventions enables less rigorous testing regimes to rival  
 325 the effectiveness of semi-weekly surveillance testing without expending additional resources. In  
 326 addition, combining interventions results in less variation in the cumulative case count, as many  
 327 layers of opportunity for infection isolation help limit the likelihood of a superspreading event  
 328 spiraling out of control (Figure 4-S1).  
 329

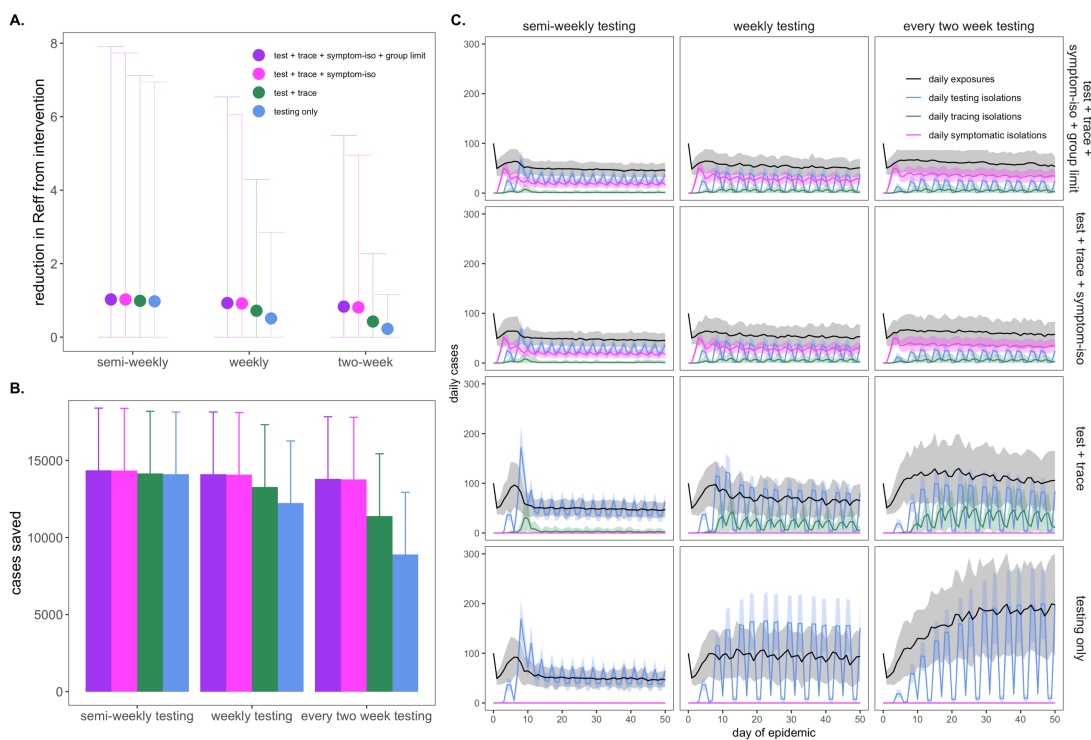

330  
 331 **Figure 4. Combining behavioral and surveillance testing NPIs for COVID-19 control.**  
 332 **A.** Mean reduction in  $R_E$ , **B.** cumulative cases saved, and **C.** daily case counts for the first 50 days of the epidemic,  
 333 across regimes of differing testing frequency and a combination of surveillance testing, contact tracing, symptomatic  
 334 isolation, and group size limit interventions. All scenarios depicted here assumed test TAT, symptomatic isolation  
 335 lags, and contact tracing lags drawn from a log-normal distribution with mean=1. LOD was fixed at  $10^1$  and group  
 336 size limits at 12. Dynamics shown here are from biweekly testing simulations in which testing was limited to two  
 337 test days per week.  
 338

339 Following on this theme, we also experimented with varying the distribution of days  
 340 allocated to surveillance testing, without changing the frequency with which each individual was  
 341 tested. Specifically, we explored semi-weekly, weekly, and every-two-week testing regimens in  
 342 which tests were administered across two, five, and seven available testing days per week. More  
 343 broadly distributed test days corresponded to fewer tests per day at a population level but, as  
 344 with more intervention layers, resulted in less variation in the cumulative total cases because  
 345 testing isolations more closely tracked daily exposures (Figure 4-S1).  
 346

### 347 **Modeling COVID-19 dynamics in the campus community.**

348 In our final analysis, we sought to advise the IGI on surveillance testing strategies  
 349 explicitly by simulating epidemics in a more realistic, heterogeneous population modeled after  
 350 the UC Berkeley campus community (Figure 5). To this end, we subdivided our 20,000 person  
 351 university population into a 5,000 person “high transmission risk” cohort and a 15,000 person  
 352 “low transmission risk” cohort, assuming “high transmission risk” status to correspond to  
 353 individuals (such as undergraduates), living in high density housing with a majority of contacts  
 354 (90%) concentrated within the UCB community and “low transmission risk status” to correspond  
 355 to individuals (such as faculty members or postdoctoral scholars) with only limited contacts  
 356 (40%) in the UCB community. We imposed a 12-person group size limit (with 90% adherence)  
 357 on the population as a whole, as recommended by the City of Berkeley Public Health  
 358 Department in the early months of the pandemic (54), and assumed a one-day average lag in  
 359 symptom-based isolation for all cohorts. To add additional realism, we enrolled only 50% of  
 360 each transmission risk group in our modeled surveillance testing program (to mimic adherence—  
 361 though surveillance testing is compulsory for undergraduates residing in residence halls at UC  
 362 Berkeley (22)). We assumed that 95% efficacy in contact tracing (with a mean tracing delay of  
 363 one day) for those enrolled in our surveillance program but only 50% efficacy for those not  
 364 enrolled; UC Berkeley has encouraged all community members to enroll in the ‘CA Notify’  
 365 digital contact tracing app developed by Apple and Google (55). For all testing interventions,  
 366 we assumed  $LOD=10^1$  cp/ $\mu$ l and  $TAT=2$  days, the average for the IGI surveillance testing lab  
 367 (21).

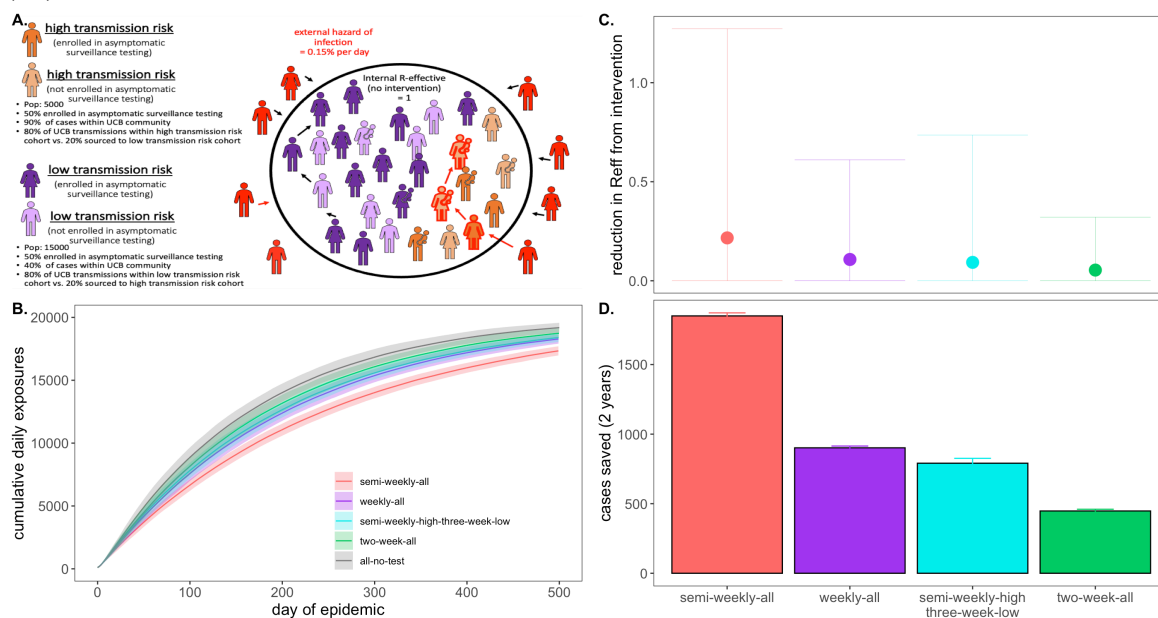

368  
 369  
 370  
 371  
 372  
 373  
 374

**Figure 5. Targeted testing of high transmission risk cohorts in a heterogenous population.**

A. Schematic of transmission risk group cohorts in the heterogenous model. The population is divided into 5,000 “high transmission risk” and 15,000 “low transmission risk” individuals, for which, 90% and 40% of the proportion of transmission events take place within the UC Berkeley community, respectively. Of those transmission events within the Berkeley community, the majority (80%) are restricted within the same transmission risk group as the infector, while 20% are sourced to the opposing risk group. Half of each cohort is assumed to be enrolled in

375 asymptomatic surveillance testing and subjected to the differing test frequency regimes depicted in panels **B.**  
376 through **D.** Panel **B.** shows the progression of cumulative cases across 730 days of simulation for each testing  
377 regime, while panel **C.** and **D.** give, respectively, the reduction in  $R_E$  and the total cases saved achieved by each test  
378 regime vs. a no intervention baseline.

379  
380 We found that targeted, semi-weekly testing of 50% of individuals in the high  
381 transmission risk cohort, paired with every-three-week testing of enrolled individuals in the low  
382 transmission risk cohort yielded mean  $R_E$  reduction and cumulative cases saved on par with that  
383 achieved from weekly testing (and better than that achieved from every-two-week testing) of all  
384 enrolled individuals in the population at large (Figure 5). Targeting the highest transmission-risk  
385 populations with testing surveillance allows practitioners to save valuable testing resources while  
386 simultaneously controlling the epidemic for the entire community. Importantly, while mean  $R_E$   
387 reduction and cumulative cases were largely comparable between the targeted, semi-weekly  
388 testing regiment and the untargeted, weekly regimen, the observed variance in intervention  
389 efficacy (Figure 5C) was substantially greater for the targeted scenario, in which the low  
390 transmission risk cohort was only tested once every three weeks. This results from a higher  
391 probability that a rare superspreading event could occur in the infrequently monitored low  
392 transmission risk cohort, thus reaffirming our previous observation that more frequent  
393 surveillance testing regimens result in more predictable—and easier to control—epidemics.

394 Notably, irrespective of intervention, the diminished transmissibility of the “low  
395 transmission risk” population in this heterogeneous model structure greatly reduced epidemic  
396 spread in subsequent simulations as compared with those presented previously in the perfectly  
397 mixed environment; as a result, we here compared interventions after 500 days of simulation,  
398 rather than 50. The heightened realism of our heterogenous population generated slow-moving  
399 epidemics more closely resembling those we are currently witnessing in our university  
400 environment.

## 401 402 **Discussion.**

403 We built a stochastic branching process model of SARS-CoV-2 spread in a university  
404 environment to advise UC Berkeley on best-practice strategies for effective asymptomatic  
405 surveillance in our pop-up IGI testing lab—and to offer a model for other institutions attempting  
406 to control the COVID-19 epidemic in their communities. While previous work has explored the  
407 isolated effects of specific NPIs—including group association limits (32), symptomatic isolation  
408 (2, 14–16, 23, 25), asymptomatic surveillance testing (14–16), and contact tracing (2, 23, 25)—  
409 on COVID-19 control, ours is the only model to date which investigates these interventions  
410 simultaneously and does so in a realistic and easily applicable setting. We offer an easy-to-  
411 implement modeling tool that can be applied in other educational and workplace settings to  
412 provide NPI recommendations tailored to the COVID-19 epidemiology of a specific  
413 environment.

414 Results from our analysis of behavior-based NPIs support previous work (2, 14–16, 23,  
415 25, 32) in showing that stringent group size limitations to minimize superspreading events and



416 rapid symptom-based isolations offer an effective means of epidemic control in the absence of  
417 surveillance testing resources. However, because of the unique natural history of the SARS-  
418 CoV-2 virus, for which the majority of transmission events result from asymptomatic or  
419 presymptomatic infections (2, 25), symptom-based NPIs cannot reduce epidemic spread  
420 completely, and small community environments will always remain vulnerable to asymptomatic  
421 case importation. Moreover, symptom-based NPIs pose less effective means of epidemic control  
422 under scenarios assuming a higher proportion of asymptomatic individuals; empirical evidence  
423 suggests that SARS-CoV-2 infection may result in asymptomatic infection in up to nearly 70%  
424 of the population in select environments (51). For this reason, our results emphasize the  
425 importance of asymptomatic surveillance testing to prevent ongoing epidemics in universities  
426 and other small community environments. As more data becomes available on both the  
427 proportion of asymptomatic infections and their contributions to SARS-CoV-2 transmission, the  
428 relative importance of group size interventions, symptom-based isolation, and asymptomatic  
429 surveillance testing in different epidemiological contexts will be possible to determine from our  
430 modeling framework.

431 As with behavioral interventions, our exploration of optimal surveillance testing regimes  
432 supports findings that have been published previously but with a few key extensions and critical  
433 novel insights. As has been recently highlighted (14, 15), we find that the most cases are saved  
434 under asymptomatic testing regimes that prioritize heightened test frequency and rapid  
435 turnaround time over test sensitivity. Importantly, we extend previous work to highlight how  
436 more rigorous testing regimes—and those combined with one or more behavioral  
437 interventions—greatly reduce variance in daily case counts, leading to more predictable  
438 epidemics. We find that the reduction in daily case variation is even more pronounced when test  
439 regimes of equivalent frequency are distributed more broadly in time (i.e. tests are offered across  
440 more days of the week), thus minimizing the likelihood of compounding transmission chains that  
441 may follow upon a superspreading event. Additionally, we demonstrate how a focused stringent  
442 testing regime for a subset of “high transmission risk” individuals can effectively control a  
443 COVID-19 epidemic for the broader community. Taken together, our model shows the utility of  
444 a multi-faceted approach to COVID-19 control and offers a flexible tool to aid in prioritization of  
445 interventions in different university or workplace settings.

446 Finally, our paper presents the only COVID-19 surveillance model published to date that  
447 combines asymptomatic testing with contact tracing, thus highlighting the compounding gains  
448 effected by these two interventions: contact tracing amplifies the control impacts of both  
449 symptom-based and surveillance testing-based isolations, such that even intervention scenarios  
450 assuming long delays in isolation after symptom onset or slow turnaround-times for test results  
451 can nonetheless greatly reduce the transmission capacity of COVID-19. These findings further  
452 emphasize the critical role that asymptomatic surveillance testing is likely to play in ongoing  
453 efforts to control COVID-19 epidemics into the 2021 year. Even limited surveillance testing may  
454 offer substantial gains in case reduction for university and workplace settings that already have



455 efficient symptomatic isolation and contact tracing programs in place. Our model allows us to  
456 prioritize when and where these gains are most likely to be achieved.

457         Because we do not explicitly model SARS-CoV-2 transmission in a mechanistic,  
458 compartmental framework (56, 57), our analysis may overlook some more subtle insights into  
459 long-term disease dynamics. More complex analyses of interacting epidemics across larger  
460 spatial scales or investigations of vaccination delivery and the duration of immunity will  
461 necessitate implementation of a complete compartmental transmission model. However, our use  
462 of a stochastic branching process framework makes our model simple to implement and easily  
463 transferrable to other semi-contained small community environments, including a wide range of  
464 academic settings and workplaces (24). We make this tool available to others interested in  
465 exploring the impacts of targeted public health interventions—in particular, surveillance testing  
466 regimes—on COVID-19 control in more specific settings in the upcoming 2021 year. We at the  
467 University of California, Berkeley are committed to maintaining the safest campus environment  
468 possible for our community, using all intervention tools at our disposal. We advise those in  
469 similar positions at other institutions to employ the behavioral interventions outlined here, in  
470 concert with effective surveillance testing regimes, to reduce community epidemics of COVID-  
471 19 in the upcoming spring season.

472

473

474

#### 475 **Acknowledgments and Funding Sources**

476 CEB was funded by the Miller Institute for Basic Research at the University of California,  
477 Berkeley, the Branco Weiss Society in Science Fellowship from ETH Zurich, a DARPA  
478 PREEMPT Cooperative Grant (no. D18AC00031), and a COVID-19 Rapid Response Research  
479 grant from the Innovative Genomics Institute at the University of California, Berkeley. MB was  
480 supported by NIH grant no. R01-GM122061-03 and NSF EEID grant no. 2011109.

481

482

483

484

485

486

487

488

489

490

491

492

493

494

495 **References**

- 496 1. Fraser C, Riley S, Anderson RM, Ferguson NM (2004) Factors that make an infectious  
497 disease outbreak controllable. *Proc Natl Acad Sci U S A* 101(16):6146–6151.
- 498 2. Ferretti L, et al. (2020) Quantifying SARS-CoV-2 transmission suggests epidemic control  
499 with digital contact tracing. *Science* 368(6491):eabb6936.
- 500 3. Petersen E, et al. (2020) Comparing SARS-CoV-2 with SARS-CoV and influenza  
501 pandemics. *Lancet Infect Dis* 20(9):e238–e244.
- 502 4. WHO (2020) Coronavirus disease (COVID-2019) situation reports. Available at:  
503 <https://www.who.int/emergencies/diseases/novel-coronavirus-2019/situation-reports>  
504 [Accessed June 30, 2020].
- 505 5. Oran DP, Topol EJ (2020) Prevalence of asymptomatic SARS-CoV-2 infection: A  
506 narrative review. *Ann Intern Med* 173(5):362–367.
- 507 6. Mizumoto K, Kagaya K, Zarebski A, Chowell G (2020) Estimating the asymptomatic  
508 proportion of coronavirus disease 2019 (COVID-19) cases on board the Diamond Princess  
509 cruise ship, Yokohama, Japan, 2020. *Eurosurveillance* 25(10):1–5.
- 510 7. Nishiura H, et al. (2020) Estimation of the asymptomatic ratio of novel coronavirus  
511 infections (COVID-19). *Int J Infect Dis* 94:154–155.
- 512 8. Treibel TA, et al. (2020) COVID-19: PCR screening of asymptomatic health-care workers  
513 at London hospital. *Lancet* 395(10237):1608–1610.
- 514 9. Emery JC, et al. (2020) The contribution of asymptomatic SARS-CoV-2 infections to  
515 transmission on the Diamond Princess cruise ship. *Elife* 9:1–68.
- 516 10. Gandhi M, Yokoe DS, Havlir D V. (2020) Asymptomatic transmission, the achilles’ heel  
517 of current strategies to control COVID-19. *N Engl J Med* 382(22):2158–2160.
- 518 11. Boyles S (2020) Covid-19: Asymptomatic transmission fueled nursing home death toll.  
519 *Physicians’ Wkly*.
- 520 12. Kam KQ, et al. (2020) A well infant with Coronavirus Disease 2019 (COVID-19) with  
521 high viral load. *Clin Infect Dis*:ciaa201.
- 522 13. Bai T, et al. (2020) Presumed asymptomatic carrier transmission of COVID-19. *J Am Med*  
523 *Assoc* 382(13):1199–1207.
- 524 14. Larremore DB, et al. (2020) Test sensitivity is secondary to frequency and turnaround  
525 time for COVID-19 surveillance. *bioRxiv*:1–21.
- 526 15. Bergstrom T, Bergstrom CT, Li H (2020) Frequency and accuracy of proactive testing for  
527 COVID-19. *medRxiv*:2020.09.05.20188839.
- 528 16. Paltiel AD, Zheng A, Walensky RP (2020) Assessment of SARS-CoV-2 Screening  
529 Strategies to Permit the Safe Reopening of College Campuses in the United States. *JAMA*  
530 *Netw open* 3(7):e2016818.
- 531 17. Hubler S, Hartocollis A (2020) How Colleges Became the New Covid Hot Spots. *New*  
532 *York Times*.
- 533 18. Richtel M (2020) Looking to Reopen, Colleges Become Labs for Coronavirus Tests and  
534 Tracking Apps. *New York Times*.

- 535 19. Nietzel MT (2020) As Covid-19 Lingers On, Universities Are Adjusting Their Spring  
536 Semester Plans, Often Eliminating Spring Break. *Forbes*.
- 537 20. Ghebreyesus TA (2020) WHO director-general's opening remarks at the media briefing  
538 on COVID-19. Available at: [https://www.who.int/dg/speeches/detail/who-director-](https://www.who.int/dg/speeches/detail/who-director-general-s-opening-remarks-at-the-media-briefing-on-covid-19---11-march-2020)  
539 [general-s-opening-remarks-at-the-media-briefing-on-covid-19---11-march-2020](https://www.who.int/dg/speeches/detail/who-director-general-s-opening-remarks-at-the-media-briefing-on-covid-19---11-march-2020).
- 540 21. Amen AM, et al. (2020) Blueprint for a pop-up SARS-CoV-2 testing lab. *Nat Biotechnol*  
541 (March). doi:10.1038/s41587-020-0583-3.
- 542 22. UC Berkeley COVID-19 Dashboard Available at:  
543 [https://coronavirus.berkeley.edu/dashboard/?utm\\_source=Response+and+Recovery&utm\\_](https://coronavirus.berkeley.edu/dashboard/?utm_source=Response+and+Recovery&utm_campaign=5247da06c4-Response_Recovery_2020_10_09&utm_medium=email&utm_term=0_940930e328-5247da06c4-389116456)  
544 [campaign=5247da06c4-](https://coronavirus.berkeley.edu/dashboard/?utm_source=Response+and+Recovery&utm_campaign=5247da06c4-Response_Recovery_2020_10_09&utm_medium=email&utm_term=0_940930e328-5247da06c4-389116456)  
545 [Response\\_Recovery\\_2020\\_10\\_09&utm\\_medium=email&utm\\_term=0\\_940930e328-](https://coronavirus.berkeley.edu/dashboard/?utm_source=Response+and+Recovery&utm_campaign=5247da06c4-Response_Recovery_2020_10_09&utm_medium=email&utm_term=0_940930e328-5247da06c4-389116456)  
546 [5247da06c4-389116456](https://coronavirus.berkeley.edu/dashboard/?utm_source=Response+and+Recovery&utm_campaign=5247da06c4-Response_Recovery_2020_10_09&utm_medium=email&utm_term=0_940930e328-5247da06c4-389116456) [Accessed October 1, 2020].
- 547 23. Peak CM, et al. (2020) Individual quarantine versus active monitoring of contacts for the  
548 mitigation of COVID-19: a modelling study. *Lancet Infect Dis*  
549 3099(20):2020.03.05.20031088.
- 550 24. Brook CE, Northrup GR, Boots M (2020) Code for “Optimizing COVID-19 control with  
551 asymptomatic surveillance testing in a university environment.”  
552 doi:10.5281/zenodo.4131223.
- 553 25. Hellewell J, et al. (2020) Feasibility of controlling COVID-19 outbreaks by isolation of  
554 cases and contacts. *Lancet Glob Heal* 8(4):e488–e496.
- 555 26. Endo A, Abbott S, Kucharski AJ, Funk S (2020) Estimating the overdispersion in  
556 COVID-19 transmission using outbreak sizes outside China. *Wellcome Open Res* 5:67.
- 557 27. Jumar S, Jha S, Rai SK (2020) Significance of super spreader events in COVID-19. *Indian*  
558 *J Public Health* 64(6):139–141.
- 559 28. Althouse BM, et al. (2020) Stochasticity and heterogeneity in the transmission dynamics  
560 of SARS-CoV-2. *arXiv* (425):1–10.
- 561 29. Hébert-Dufresne L, Althouse BM, Scarpino S V., Allard A (2020) Beyond R0:  
562 Heterogeneity in secondary infections and probabilistic epidemic forecasting. *medRxiv*  
563 0(1):1–8.
- 564 30. Liu Y, Eggo RM, Kucharski AJ (2020) Secondary attack rate and superspreading events  
565 for SARS-CoV-2. *Lancet* 395(10227):e47.
- 566 31. Adam DC, et al. (2559) Clustering and superspreading potential of severe acute  
567 respiratory syndrome coronavirus 2 (SARS-CoV-2) infections in Hong Kong. *J Vis Lang*  
568 *Comput* 11(3):55.
- 569 32. Kain MP, Childs ML, Becker AD, Mordecai EA (2020) Chopping the tail: how preventing  
570 superspreading can help to maintain COVID-19 control. *medRxiv Prepr Serv Heal Sci*.  
571 doi:10.1101/2020.06.30.20143115.
- 572 33. Laxminarayan R, et al. (2020) Epidemiology and transmission dynamics of COVID-19 in  
573 two Indian states. *Science* 28(2):eabd7672.
- 574 34. Lau MSY, et al. (2020) Characterizing superspreading events and age-specific  
575 infectiousness of SARS-CoV-2 transmission in Georgia, USA. *Proc Natl Acad Sci U S A*  
576 117(36):22430–22435.

- 577 35. Goyal A, Reeves DB, Fabian Cardozo-Ojeda E, Schiffer JT, Mayer BT (2020) Wrong  
578 person, place and time: viral load and contact network structure predict 4 SARS-CoV-2  
579 transmission and super-spreading events 5 6 7. *medRxiv*:2020.08.07.20169920.
- 580 36. Nielsen BF, Sneppen K (2020) COVID-19 superspreading suggests mitigation by social  
581 network modulation. *medRxiv*:2020.09.15.20195008.
- 582 37. Perelson AS (2002) Modelling viral and immune system dynamics. *Nat Rev Immunol*  
583 2(1):28–36.
- 584 38. Ho DD, et al. (1995) Rapid turnover of plasma virions and CD4 lymphocytes in HIV-1  
585 infection. *Nature* 373:123–126.
- 586 39. Nowak MA, May RM (2000) *Virus Dynamics: Mathematical Principles of Immunology*  
587 *and Virology* (Oxford University Press, Oxford, UK).
- 588 40. Ke R, Zitzmann C, Ribeiro RM, Perelson AS (2020) Kinetics of SARS-CoV-2 infection in  
589 the human upper and lower respiratory tracts and their relationship with infectiousness.  
590 *medRxiv*:2020.09.25.20201772.
- 591 41. Schwab J, Balzer LB, Geng E, Peng J, Petersen ML Local Epidemic Modeling for  
592 Management and Action. Available at: <https://localepi.github.io/LEMMA/>.
- 593 42. Kucirka LM, Lauer SA, Laeyendecker O, Boon D, Lessler J (2020) Variation in false-  
594 negative rate of reverse transcriptase polymerase chain reaction–based SARS-CoV-2 tests  
595 by time since exposure. *Ann Intern Med*. doi:10.7326/m20-1495.
- 596 43. Wölfel R, et al. (2020) Virological assessment of hospitalized patients with COVID-2019.  
597 *Nature* 581(7809):465–469.
- 598 44. Quicke K, et al. (2020) Longitudinal surveillance for SARS-CoV-2 RNA among  
599 asymptomatic staff in five Colorado skilled nursing facilities: Epidemiologic, virologic  
600 and sequence analysis. *medRxiv*. doi:10.1101/2020.06.08.20125989v1.
- 601 45. La Scola B, et al. (2020) Viral RNA load as determined by cell culture as a management  
602 tool for discharge of SARS-CoV-2 patients from infectious disease wards. *Eur J Clin*  
603 *Microbiol Infect Dis* 39(6):1059–1061.
- 604 46. Vogels CBF, et al. (2020) Analytical sensitivity and efficiency comparisons of SARS-  
605 CoV-2 RT–qPCR primer–probe sets. *Nat Microbiol* (4). doi:10.1038/s41564-020-0761-6.
- 606 47. Meyerson NR, et al. (2020) A community-deployable SARS-CoV-2 screening test using  
607 raw saliva with 45 minutes sample-to-results turnaround. *medRxiv*:2020.07.16.20150250.
- 608 48. Dao Thi VL, et al. (2020) A colorimetric RT-LAMP assay and LAMP-sequencing for  
609 detecting SARS-CoV-2 RNA in clinical samples. *Sci Transl Med* 12(556).  
610 doi:10.1126/SCITRANSLMED.ABC7075.
- 611 49. Chitwood MH, et al. (2020) Bayesian nowcasting with adjustment for delayed and  
612 incomplete reporting to estimate COVID-19 infections in the United States. *medRxiv*  
613 20(7):1–6.
- 614 50. Public Affairs UB (2020) Social gatherings produce increase in student COVID-19 cases.  
615 *Berkeley News*.
- 616 51. Poletti P, et al. (2020) Probability of symptoms and critical disease after SARS-CoV-2  
617 infection. *arXiv*. Available at: <http://arxiv.org/abs/2006.08471>.

618 52. Wu KJ (2020) 'It's Like Groundhog Day': Coronavirus Testing Labs Again Lack Key  
619 Supplies. *New York Times*.

620 53. Meyer R, Madrigal AC (2020) The Plan That Could Give Us Our Lives Back. *Atl*.

621 54. Officer C of BPH (2020) *Order of the Health Officer of the City of Berkeley Imposing*  
622 *Measure Necessary to Control the Spread of COVID-19*.

623 55. Health USD (2020) CA Notify. Available at: <https://canotify.ca.gov/> [Accessed December  
624 21, 2020].

625 56. Anderson RM, May RM, Boily MC, Garnett GP, Rowley JT (1991) The spread of HIV-1  
626 in Africa: sexual conflict patterns and the predicted demographic impact of AIDS. *Nature*  
627 352:581–589.

628 57. Kermack WO, McKendrick AG (1927) A contribution to the mathematical theory of  
629 epidemics. *Proc R Soc London, Ser A* 115:700–721.

630

631

632

633

634

635

636

637

638

639

640

641

642

643

644

645

646

647

648

649

650

651

652

653

654

655

656

657

658 **Supplementary Figures**  
659

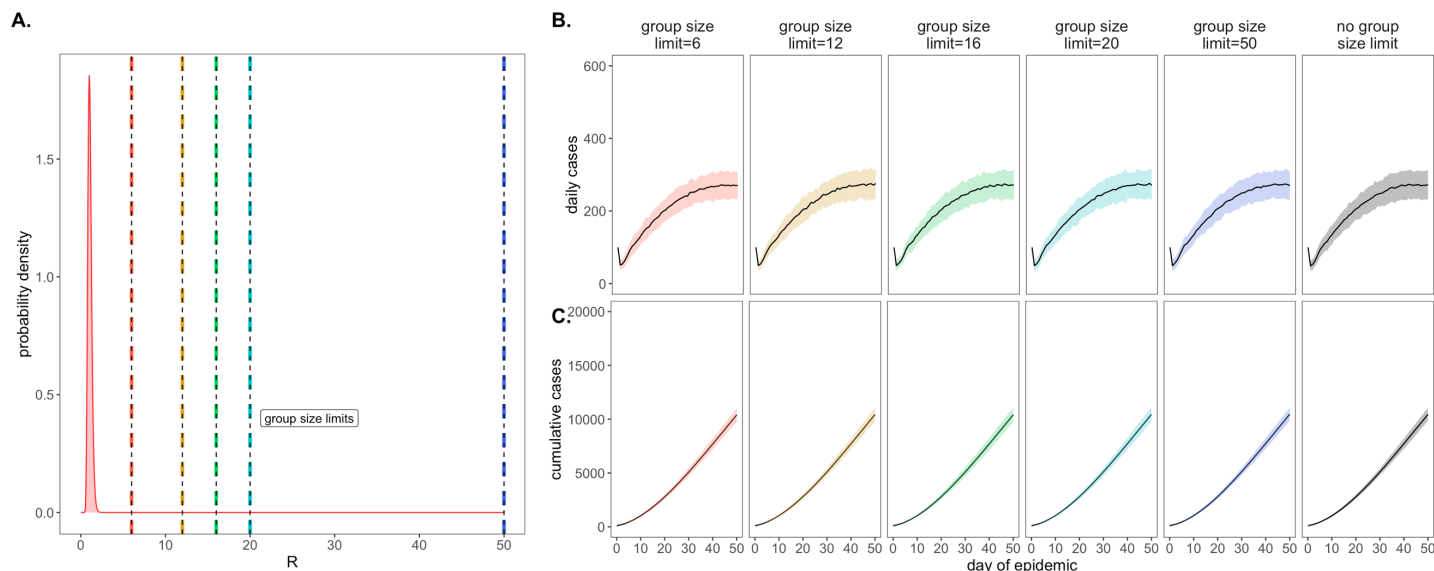

660  
661 **Figure 2-S1.** Figure replicates Fig. 2 (main text) at a log-normal distribution for  $R_E$ , instead of negative binomial. **A.**  
662 Log-normal  $R_E$  distribution with a mean of 1.05 and a standard deviation of 1.233. The colored vertical dashes  
663 indicate the group size limits that ‘chop the tail’ on the  $R_E$  distribution. **B.** Daily new cases and, **C.** cumulative cases,  
664 across a 50-day time series under corresponding, color-coded group size limits.

665

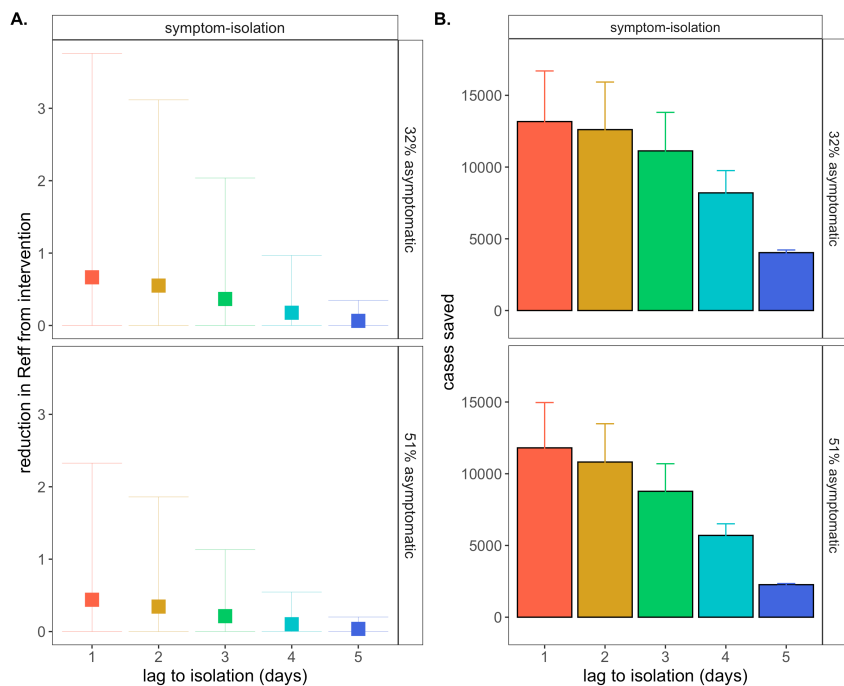

666  
667 **Figure 3-S1.** Figure replicates symptom-isolation panels from Fig. 3 (main text) in top row, showing **A.** mean  
668 reduction in  $R_E$  and **B.** cumulative cases saved across 50-day simulated epidemics under differing lag times to  
669 isolation, assuming a threshold titer for symptom onset by which ~32% of the population presents as asymptomatic.  
670 A comparison at a titer threshold for which ~51% of the population presents as asymptomatic demonstrates how a  
671 higher proportion of asymptomatic individuals in the population erodes the effectiveness of the symptom-based  
672 isolation intervention; asymptomatic status has no impact on the effectiveness of group size limits or asymptomatic  
673 surveillance testing interventions.



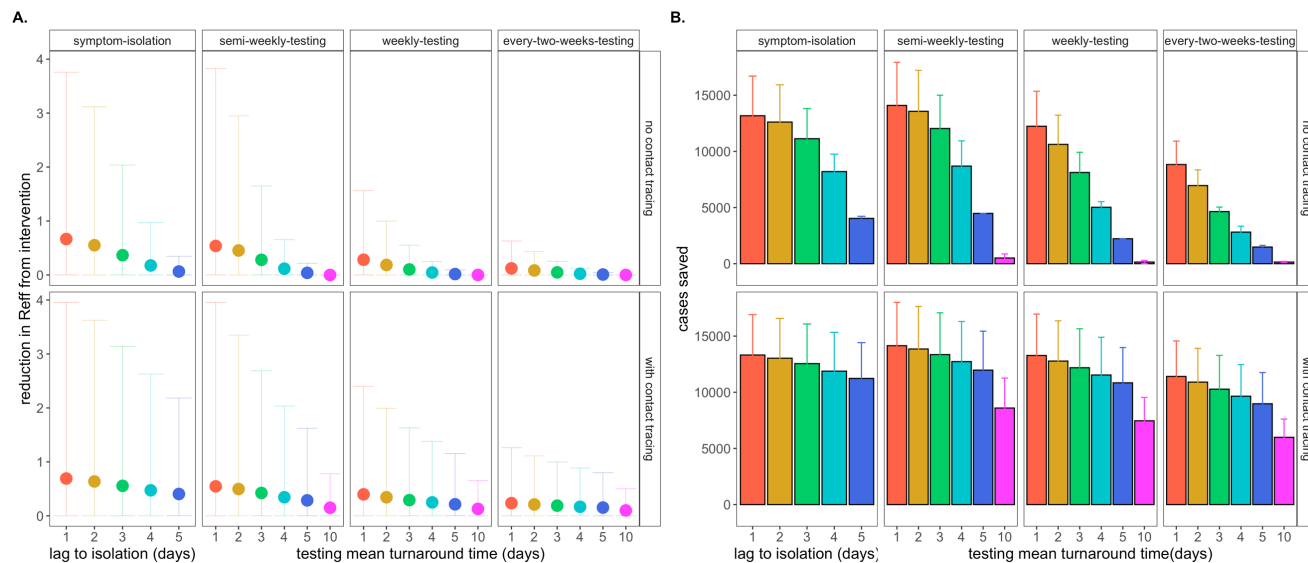

674  
 675 **Figure 3-S2.** Figure replicates symptom-isolation panels from Fig. 3 (main text) in top row, showing **A.** mean  
 676 reduction in  $R_E$  and **B.** cumulative cases saved across 50-day simulated epidemics for NPIs of both symptom-based  
 677 and testing-based isolation, across a range of different lag times or turnaround times to isolation (for, respectively  
 678 symptom- or testing-based isolations). All testing-based interventions depicted are shown at a  $LOD=10^1$  cp/ $\mu$ l. In  
 679 the bottom row, **A.** mean reduction in  $R_E$  and **B.** cumulative cases saved are depicted for a comparative intervention  
 680 which adds an additional single-day lag in contact tracing to the respective symptom-based or testing-based  
 681 isolation. Under these combined interventions, even previously ineffective testing interventions with 10-day TAT  
 682 show gains beyond no intervention at all.

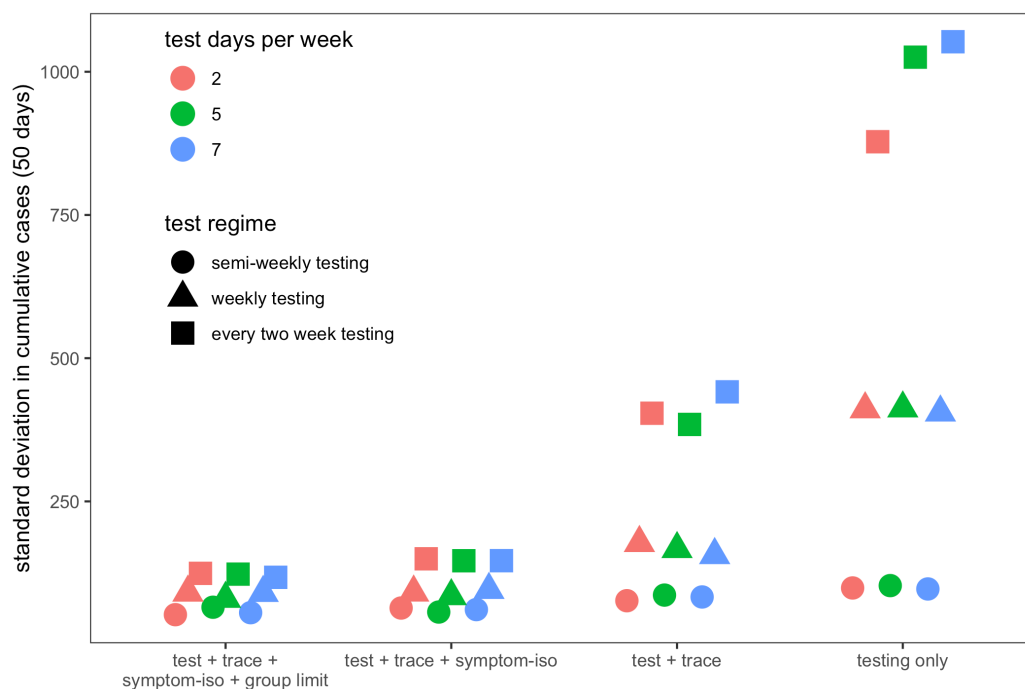

683  
 684 **Figure 4-S1.** Figure extends results from Fig. 4 (main text), showing the standard deviation in cumulative cases  
 685 from 50-day simulated epidemics, across regimes of differing testing frequency and a combination of surveillance  
 686 testing, contact tracing, symptomatic isolation, and group size limit interventions. All scenarios depicted here  
 687 assume test TAT, symptomatic isolation lags, and contact tracing lags drawn from a log-normal distribution with  
 688 mean=1.  $LOD$  is fixed at  $10^1$  and group size limits at 12. Dynamics compare tests of differing frequency (semi-  
 689 weekly, weekly, every two weeks) distributed across variable numbers of days in a given week (2,5,7). Additional  
 690 layers of intervention and more testing days per week reduce the standard deviation in cumulative cases.

## 1 **Supplementary File 1.**

2

### 3 **Text A. *Model Description.***

4 Our publicly-available Github repository (1) provides opensource code to reproduce all  
5 simulations and analyses presented in our paper. We summarize the practical implementation  
6 details of our modeling design for ease-of-access here.

7 Our model takes the form of a stochastic branching process model, in which a subset  
8 population of exposed individuals (0.5%, derived from the mean percentage of positive tests in  
9 our UC Berkeley community (2)) is introduced into a hypothetical 20,000 person community that  
10 approximates the campus utilization goals for our university in spring 2021. The model code  
11 builds up to a single function `replicate.epidemic()` which runs a specified number of stochastic  
12 simulations from a defined parameter set, using the function `simulate.epidemic()`. Within the  
13 `simulate.epidemic()` function, we first construct a population of 20,000 persons in the sub-  
14 function, `initiate.pop()`. Within this initiation function, each person in our population is  
15 individually numbered, assigned a viral titer trajectory that will be followed if that individual  
16 becomes infected (Text B), and assigned a suite of disease metrics drawn stochastically from a  
17 specified set of parameter distributions, as outlined in Text C.

18

### 19 **Text B. *Within-host viral dynamics***

#### 20 *Titer Trajectories.*

21 For computational efficiency, we pre-generated 20,000 50-day individual titer trajectories  
22 and saved them as an .Rdata file, "titer.dat.20K.Rdata". To generate these trajectories, we used  
23 a within-host viral kinetics model structured after the classic target cell model (3–5). Code for  
24 this model is available in the `model-sandbox` folder of our Github release, under file `viral-  
25 load.R`, which iterates the following simple model and parameter values derived from Ke et al.  
26 (2020), describing the dynamics of SARS-CoV-2 proliferation in the upper respiratory tract (6):  
27

$$28 \frac{dT_C}{dt} = -\beta T_C V$$

$$29 \frac{dE}{dt} = \beta T_C V - kE$$

$$30 \frac{dI}{dt} = kE - \delta I$$

$$31 \frac{dV}{dt} = pI - cV$$

32

33 where  $T_C$  corresponds to the target cell population,  $\beta$  is the transmission rate of free virus to  
34 target cell invasion,  $k$  corresponds to the inverse of the duration of the virus eclipse phase, and  $\delta$   
35 corresponds to the inverse of the incubation period of an infected cell.  $p$  then gives the burst size  
36 of a virus-infected cell and  $c$  equals the inverse of the lifespan of free virus subject to natural

37 virus mortality and immune predation. Parameter values used to generate each titer trajectory  
38 (with a standard deviation of .1x the value of each parameter introduced to add stochasticity in  
39 each iteration) are derived from Ke et al. (2020) (6), after fitting this model to individual patient  
40 data tracking viral loads through time in the upper respiratory tract of SARS-CoV-2-infected  
41 individuals:

42

43 *starting conditions:*  $T_C = 4 * 10^6$ ;  $E = 0$ ;  $I = 1$ ;  $V = 0$

44 *parameter values:*  $\beta = 1.9 * 10^{-6}$ ;  $k = 4$ ;  $c = 10$ ;  $\delta = 1.9$ ;  $p = 51.4$

45

46 Note that Ke et al. (2020) (6) also explore the within-host dynamics of SARS-CoV-2 infection in  
47 the lower respiratory tract; however, since we model human-to-human transmissibility as  
48 inferred by viral load in nasopharyngeal swab samples (which better reflect the viral load in the  
49 upper respiratory tract), we ignore the lower respiratory dynamics here.

50

### 51 *Infectivity by Viral Load.*

52 After Ke et al. (2020) (6), we next estimated the probability of infection given contact at a  
53 specific viral load, using a Michaelis-Menton-like function. Following Ke et al. (2020), we  
54 described the probability this probability as:

55 
$$P(\text{transmission}) = 1 - \exp\left(-1 * \left(\theta \left(\frac{V}{V + K_m}\right)\right)\right)$$

56 where  $K_m$  corresponds to the saturation constant by which proportional gains in infectiousness  
57 with viral load diminish at increasingly high viral titers and  $\theta$  is a constant, such that the  
58 maximum transmission capacity at any moment equals  $1 - e^{-\theta}$ . Ke et al. (2020) modeled a  
59 constant hazard of contact events for infectious individuals and therefore fixed  $\theta$  at a value of  
60 0.05, corresponding to a ~5% probability of a given contact resulting in transmission. Because  
61 we draw possible transmissions events from a negative binomial SARS-CoV-2  $R_0$  distribution,  
62 (mean= 2.5 and  $k=0.10$  (7)) but ultimately know that  $R_E$  for our university environment should  
63 have a value of just above one (8), we instead fixed  $\theta$  at a value of 0.72, corresponding to a  
64 ~51% probability of a given contact resulting in transmission, thus effectively halving  $R_0$   
65 to generate  $R_E$ . The exact probability varied as a function of the timing of each contact event across  
66 the trajectory of within-host viral load, with transmissions favored earlier in an infection  
67 trajectory when viral load peaks (9).

68

### 69 **Text C. Individual disease metrics**

70 Figures in our paper are derived from 100x replications of each set of parameter values, which  
71 we manipulate to explore a range of non-pharmaceutical interventions (NPIs) to combat COVID-  
72 19 dynamics in our system. Our flexible model allows for the introduction of NPIs for COVID-  
73 19 control in four different forms: (1) group size limits, (2) symptom-based isolations, (3)  
74 surveillance testing isolations, and (4) contact tracing isolations that follow after cases are  
75 identified through screening from symptomatic or surveillance testing. These interventions

76 modify the suite of disease metrics drawn upon model initiation for each numbered individual in  
77 the dataset. We summarize the disease metrics drawn at initiation for all members of the  
78 population here:

- 79 • **Time of next test:** allocated based on the selected asymptomatic surveillance testing regime.  
80 We assume the week starts with day 1 on Saturday and day 7 on Friday. If  $n.test.days = 2$ , then  
81 tests are distributed on Monday (day 3) and Friday (day 7) of each week. As timesteps  
82 advance and individuals reach their respective test days, the next test day is updated based on  
83 the testing regime (if semi-weekly, the next test day is advanced 3 days; if weekly, the next  
84 test day is advanced 7 days; if every-two-weeks, the next test day is advanced 14 days).
- 85 • **Beginning/end time of test sensitivity:** based on test limit of detection (LOD) as specified at  
86 model outset, this corresponds to the timestep post exposure at which an individual viral titer  
87 crosses the threshold for being detectable by the chosen test, both as titers increase at the  
88 beginning of a disease trajectory and decrease at the end.
- 89 • **Adherence with testing regime:** Y/N, allocated randomly across individuals based on the  
90 proportion of the population modeled as complying with the surveillance testing intervention  
91 (90% of individuals in all scenarios modeled in our paper).
- 92 • **Adherence with group limit:** Y/N, allocated randomly across individuals based on the  
93 proportion of the population modeled as complying with the group size limits imposed at  
94 outset (90% of individuals in all scenarios modeled in our paper; see ‘number of potential  
95 onward cases generated for’ for how group size interacts with cases).
- 96 • **Adherence with contact tracing regimen:** Y/N, allocated randomly across individuals based  
97 on the proportion of the population modeled as complying with the contact tracing  
98 intervention imposed at outset (90% of individuals in all scenarios modeled in our paper).
- 99 • **Time of symptom onset:** determined by randomly drawing a titer limit for symptom onset for  
100 each individual from a lognormal distribution with a mean of  $1e+05$  cp/ $\mu$ l RNA and a  
101 standard deviation of  $1e+04$  cp/ $\mu$ l (10–12). The timing of symptom onset then corresponds to  
102 the time post-exposure at which each individual’s titer trajectory crosses the corresponding  
103 titer limit. According to this approach, under default parameter values, symptom onset  
104 occurred between 2 to 4 days post-exposure in our model, and ~32% of the population never  
105 presented with symptoms at all (Fig. 1, main text).
- 106 • **Time of symptom-based isolation:** based on delay lag post-symptom onset, drawn from a  
107 lognormal distribution with a mean of the specified number of days of symptom isolation lag  
108 (1-5 or infinity) and a standard deviation of 0.5 days.
- 109 • **Time of tracing-based isolation:** based on contact tracing lag for those adhering to the  
110 contact tracing regimen in place. Parameter must be updated with each timestep until  
111 individual becomes infected; value then becomes fixed at time of infector isolation, plus  
112 corresponding lag drawn from a lognormal distribution with a mean of one day and a standard  
113 deviation of 0.5 days.

- 114 • **Time of testing-based isolation:** based on turnaround time (TAT) to isolation post testing,  
115 drawn from a lognormal distribution with a mean of the specified number of delay days (1-5,  
116 10, or infinity) and a standard deviation of 0.5 days. Parameter is updated when ‘time of next  
117 test’ is updated for each individual in our model.
- 118 • **Disease status:** ‘susceptible’ = 0, ‘exposed’ = 3, ‘infectious’ = 1, ‘recovered’ = 5. At onset, all  
119 individuals are modeled as susceptible, excepting the 0.5% which are introduced as infectious  
120 (1) to seed the epidemic. *Note that our model encodes a “prop-vaccinated” parameter for the*  
121 *proportion of the target population that is vaccinated prior to the start of epidemic*  
122 *simulations. Though we do not explore vaccination scenarios in this analysis, other*  
123 *practitioners interested in exploring the efficacy of each NPI on populations with a subset of*  
124 *immunized individuals could alter this value (currently fixed at 0) to reflect this. The*  
125 *proportion of the population that is specified as vaccinated will then be assigned disease*  
126 *status = 5 (recovered) at the onset of each simulation.*
- 127 • **Number of potential onward cases generated:** Several figures in the main text of our  
128 manuscript present the  $R_E$  reduction capacity of a specified intervention, which we calculate  
129 as the difference between the average of the number of potential onward cases generated and  
130 the number of actual onward cases generated for each individual after an intervention is  
131 adopted. To compute the number of potential onward cases generated for each individual, we  
132 first draw a number of possible cases from a negative binomial distribution with a mean of 2.5  
133 and a dispersion parameter ( $k$ ) of 0.10, as estimated for SARS-CoV-2 (7). Next, we draw a  
134 number of possible onward transmission events for each infectious individual from a simple  
135 Poisson distribution with  $\lambda = 3$ , signifying the average number of possible encounters (i.e.  
136 cross-household dining, shared car rides, indoor meetings, etc.) per person that could result in  
137 transmission. We then distribute each infectious person’s original number of  $R_0$ -derived  
138 potential cases among these events at random, ensuring that multiple transmissions are  
139 possible at a single event; the most extreme superspreading events thus occur when persons  
140 with heterogeneously high infectiousness draw a large number of potential cases, which are  
141 concentrated within a relatively small number of discrete transmission events. For example, if  
142 an infectious individual draws an  $R_0$  value of 16 and an event number value of 4, then those  
143 16 potential infections are randomly distributed among 4 events.

144 Next, we use published estimates of the generation time of onward transmission events for  
145 SARS-CoV-2 infection to draw event times for each event, based on a weibull distribution  
146 with a shape parameter = 2.826 and a scale parameter = 5.665, as specified in Ferretti et al.  
147 (2020) (9). Following the above example, 4 discrete generation times would be assigned to  
148 cases across the 4 pre-allocated events.

149 Since each individual is already pre-assigned a within-host viral titer trajectory in our  
150 modeling framework, we next examine the viral load specified at the generation time of each  
151 transmission event and determine if each case assigned to that event actually occurs. Each  
152 case is considered individually, and the probability of transmission is computed stochastically  
153 based on the value of the individual’s viral titer at the time of the event (higher titer infections

154 are more likely to generate onward transmission events) (Text B). In the above example, all  
155 16 possible transmissions would be individually assessed, though several would have the  
156 same titer, corresponding to the infectious person's titer at the time point of each contact event  
157 (4 possible). Since our maximum probability of a case occurring at max viral load is ~51%  
158 (Text B), our original  $R_0$ -derived cases are here halved, resulting in an average of 1.05 onward  
159 transmission events per infectious individual in the absence of the NPIs examined here (but  
160 reflecting social distancing and mask wearing), which, as specified in the main text, is in line  
161 with current estimates from Alameda County, CA (8).

162 For the purposes of our example, let's assume that 10 of those possible 16 cases occur,  
163 allocated across 4 different events, with 7 cases at one event and one case each at 3 other  
164 events.

165 • **Number of actual onward cases generated:** From the number of possible cases generated,  
166 we next apply the relevant intervention and iterate forward in time to determine the actual  
167 number of cases generated by each infectious individual across the time course of our  
168 modeled epidemics. For symptom and surveillance testing-based isolations, as well as contact  
169 tracing, no cases are generated if an infectious individual is isolated prior to the generation  
170 time of any possible onward cases. For NPIs in the form of group size limits, case reduction in  
171 our model is performed prior to the initiation of the epidemic time series, and case numbers  
172 for each transmission event are truncated at the intervention limit.

173 Again following the example listed above, if we imagine that the imposed group size limit  
174 is 6, then the 7 cases assigned to a single event will be truncated to 6, meaning that 9 out of  
175 the 10 potential cases is allowed to occur after the intervention. Our model is conservative in  
176 assessing the impact of a group-size intervention by allowing some portion of those  
177 superspreading cases to occur, rather than assuming that a group size limit-abiding infectious  
178 individual does not attend larger-than-allowable events altogether. Because only 90% of the  
179 population adheres to group size intervention in any given simulation, some proportion of  
180 large superspreading events will still take place at random, even after NPIs are imposed.

181  
182 Following onset of infection, the timings of symptom-, tracing-, and asymptomatic testing-based  
183 isolations are then compared and the earliest time is selected as the actual mechanism (if any) of  
184 isolation for that individual. The number of actual onward cases generated is then updated if  
185 isolation occurs prior to some new case generations. Additionally, all individuals identified as  
186 infectious are additionally assigned the following metrics:

- 187 • **Isolation time of infector**
- 188 • **Source of infection** (external Alameda County vs. UC Berkeley community member)
- 189 • **ID number of infector**, if from UC Berkeley

190 The cycle then repeats in the next timestep when all "actual infections" for each infectious  
191 individual are then assigned to new susceptible individuals. The epidemic continues with



192 updated parameters for all newly exposed individuals until either the end of the time series is  
193 reached or no more susceptible individuals remain in the population.

194

### 195 **References for Supplementary File 1.**

- 196 1. Brook CE, Northrup GR, Boots M (2020) Code for “Optimizing COVID-19 control with  
197 asymptomatic surveillance testing in a university environment.”  
198 doi:10.5281/zenodo.4131223.
- 199 2. UC Berkeley COVID-19 Dashboard Available at:  
200 [https://coronavirus.berkeley.edu/dashboard/?utm\\_source=Response+and+Recovery&utm\\_](https://coronavirus.berkeley.edu/dashboard/?utm_source=Response+and+Recovery&utm_campaign=5247da06c4-Response_Recovery_2020_10_09&utm_medium=email&utm_term=0_940930e328-5247da06c4-389116456)  
201 [campaign=5247da06c4-](https://coronavirus.berkeley.edu/dashboard/?utm_source=Response+and+Recovery&utm_campaign=5247da06c4-Response_Recovery_2020_10_09&utm_medium=email&utm_term=0_940930e328-5247da06c4-389116456)  
202 [Response\\_Recovery\\_2020\\_10\\_09&utm\\_medium=email&utm\\_term=0\\_940930e328-](https://coronavirus.berkeley.edu/dashboard/?utm_source=Response+and+Recovery&utm_campaign=5247da06c4-Response_Recovery_2020_10_09&utm_medium=email&utm_term=0_940930e328-5247da06c4-389116456)  
203 [5247da06c4-389116456](https://coronavirus.berkeley.edu/dashboard/?utm_source=Response+and+Recovery&utm_campaign=5247da06c4-Response_Recovery_2020_10_09&utm_medium=email&utm_term=0_940930e328-5247da06c4-389116456) [Accessed October 1, 2020].
- 204 3. Perelson AS (2002) Modelling viral and immune system dynamics. *Nat Rev Immunol*  
205 2(1):28–36.
- 206 4. Ho DD, et al. (1995) Rapid turnover of plasma virions and CD4 lymphocytes in HIV-1  
207 infection. *Nature* 373:123–126.
- 208 5. Nowak MA, May RM (2000) *Virus Dynamics: Mathematical Principles of Immunology*  
209 *and Virology* (Oxford University Press, Oxford, UK).
- 210 6. Ke R, Zitzmann C, Ribeiro RM, Perelson AS (2020) Kinetics of SARS-CoV-2 infection in  
211 the human upper and lower respiratory tracts and their relationship with infectiousness.  
212 *medRxiv*:2020.09.25.20201772.
- 213 7. Endo A, Abbott S, Kucharski AJ, Funk S (2020) Estimating the overdispersion in  
214 COVID-19 transmission using outbreak sizes outside China. *Wellcome Open Res* 5:67.
- 215 8. Schwab J, Balzer LB, Geng E, Peng J, Petersen ML Local Epidemic Modeling for  
216 Management and Action. Available at: <https://localepi.github.io/LEMMA/>.
- 217 9. Ferretti L, et al. (2020) Quantifying SARS-CoV-2 transmission suggests epidemic control  
218 with digital contact tracing. *Science* 368(6491):eabb6936.
- 219 10. Wölfel R, et al. (2020) Virological assessment of hospitalized patients with COVID-2019.  
220 *Nature* 581(7809):465–469.
- 221 11. Quicke K, et al. (2020) Longitudinal surveillance for SARS-CoV-2 RNA among  
222 asymptomatic staff in five Colorado skilled nursing facilities: Epidemiologic, virologic  
223 and sequence analysis. *medRxiv*. doi:10.1101/2020.06.08.20125989v1.
- 224 12. La Scola B, et al. (2020) Viral RNA load as determined by cell culture as a management  
225 tool for discharge of SARS-CoV-2 patients from infectious disease wards. *Eur J Clin*  
226 *Microbiol Infect Dis* 39(6):1059–1061.

227

228

229

230

231

232 **Legends for Supplementary Files 2-4.**

233 **Supplementary File 2. Averaged total cases saved and mean  $R_E$  reduction across group size**  
234 **limit, symptomatic isolation, and surveillance testing NPIs.** Summarized model output from  
235 100x simulations across all NPIs presented in Fig. 2 and Fig. 3, main text. Confidence intervals  
236 represent 1.96\*standard deviation in case reduction or  $R_E$  reduction.

237

238 **Supplementary File 3. Averaged total cases saved and mean  $R_E$  reduction across**  
239 **symptomatic isolation, and surveillance testing NPIs, under regimes with and without**  
240 **contact tracing.** Summarized model output from 100x simulations across all NPIs presented in  
241 SI-Appendix, Fig. S3.

242

243 **Supplementary File 4. Averaged total cases saved and mean  $R_E$  reduction across combined**  
244 **intervention approaches.** Summarized model output from 100x simulations across all NPIs  
245 presented in Fig. 4, main text.

246

247 All other model output available as saved .Rdata files in our publicly-available Github  
248 repository:

249 Brook CE, Northrup GR, Boots M (2020) Code for “Optimizing COVID-19 control with  
250 asymptomatic surveillance testing in a university environment.” doi:10.5281/zenodo.4131223

251

252

253

254

255

256

257

258

259

260

261

262

263

264

265

266

267

268
